# Supplementary material for: Transcriptional Consequence and Impaired Gametogenesis with High-Grade Aneuploidy in Arabidopsis thaliana
Source: PubMed Central journal article supplement (PMC4267805; doi:10.1371/journal.pone.0114617), 2014-12-16
Supplement: pone.0114617.s001.pdf [file pone.0114617.s001.pdf]

## Supporting Information

### Transcriptional consequence and impaired gametogenesis with high-grade aneuploidy in *Arabidopsis thaliana*

Kuan-Lin Lo<sup>1,§</sup>, Long-Chi Wang<sup>2,§</sup>, I-Ju Chen<sup>1</sup>, Yu-Chen Liu<sup>1</sup>, Mei-Chu Chung<sup>1</sup> and Wan-Sheng Lo<sup>1,\*</sup>

<sup>1</sup>Institute of Plant and Microbial Biology, Academia Sinica, Taipei, Taiwan

<sup>2</sup>Biotechnology Center, National Chung-Hsing University, Taichung, Taiwan

<sup>§</sup>These authors contributed equally to this work

\*Corresponding author

#### Supplemental Figures

Figure S1 page 2

Figure S2 page 3

Figure S3 page 4

Figure S4 page 5

#### Supplemental Tables

Table S1 page 6

Table S2 page 7-8

Table S3 page 9-10

Table S4 page 11-12

Table S5 page 13

## Supplemental Figures

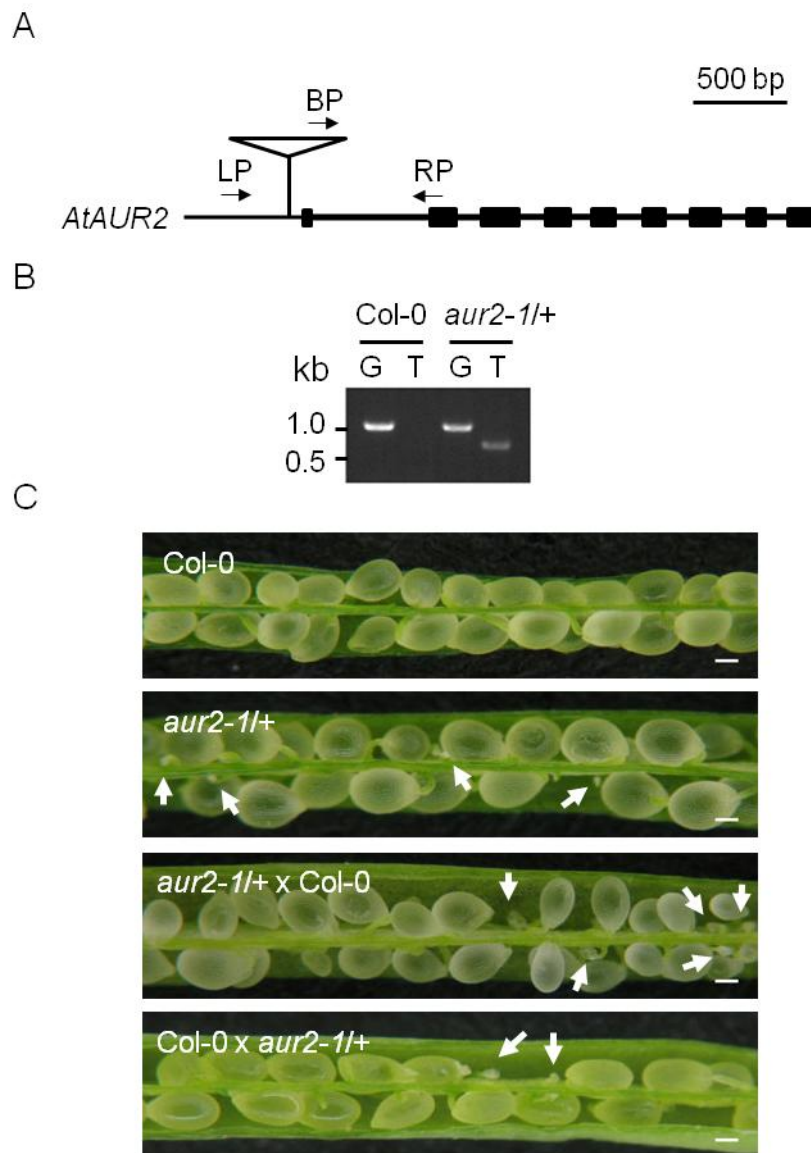

**Figure S1. Seed development in self-fertilized and manually crossed *aur2-1/+*.**

**(A)** Schematic representation of T-DNA insertion site in the *AtAUR2* locus. The upstream region is shown as a line and exons as black boxes. The locations of primers (LP and RP) flanking *AtAUR2* and T-DNA-specific primer (BP) are indicated by arrows. **(B)** Genotyping of wild type (Col-0) and *aur2-1/+*. G, PCR product amplified by LP and RP primers for wild type allele; T, amplification by BP and RP primers for T-DNA allele. **(C)** Seed development in the siliques of the self-fertilized wild type (Col-0), *aur2-1/+* and F1 siliques from reciprocal crosses (female x male). Arrows indicate undeveloped seeds. Scale bar, 200  $\mu$ m.

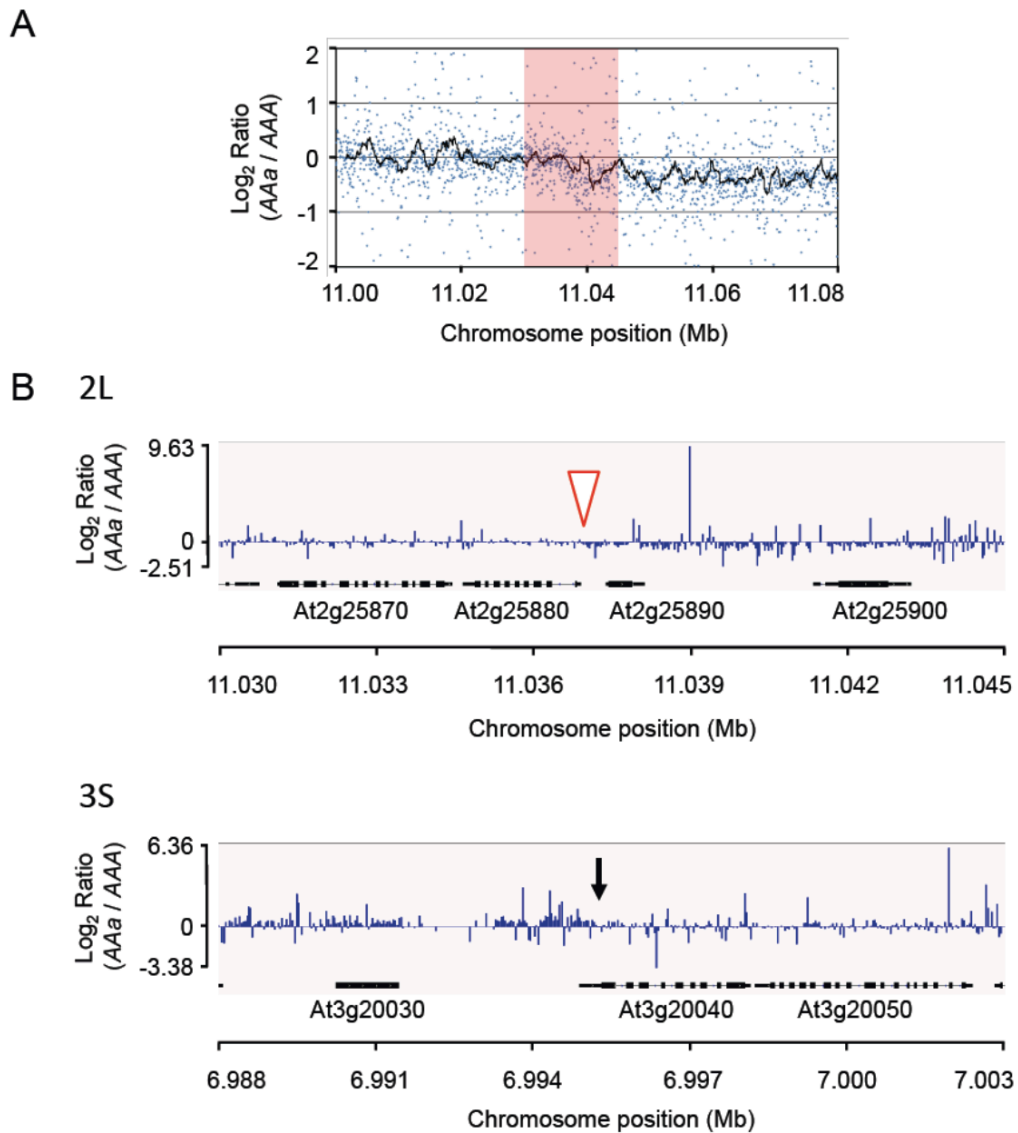

**Figure S2. Translocation breakpoints of the tertiary trisomy 2 (*aur2-1/+; AAa*).**

(A) A zoom-in diagram from the shaded region of the chromosome 2 in the Fig. 2A. The translocation breakpoint is mapped within the shaded region in pink. The moving average of the ratio of signal intensities in 2 trisomy genomes is shown. (B) Locations of the *AUR2* locus (At2g25880) with a T-DNA insertion (inverted triangle) and adjacent annotated genes within the shaded region in (A) (upper panel). Locations of annotated genes and translocation breakpoint (arrow) on the chromosome 3 (lower panel)

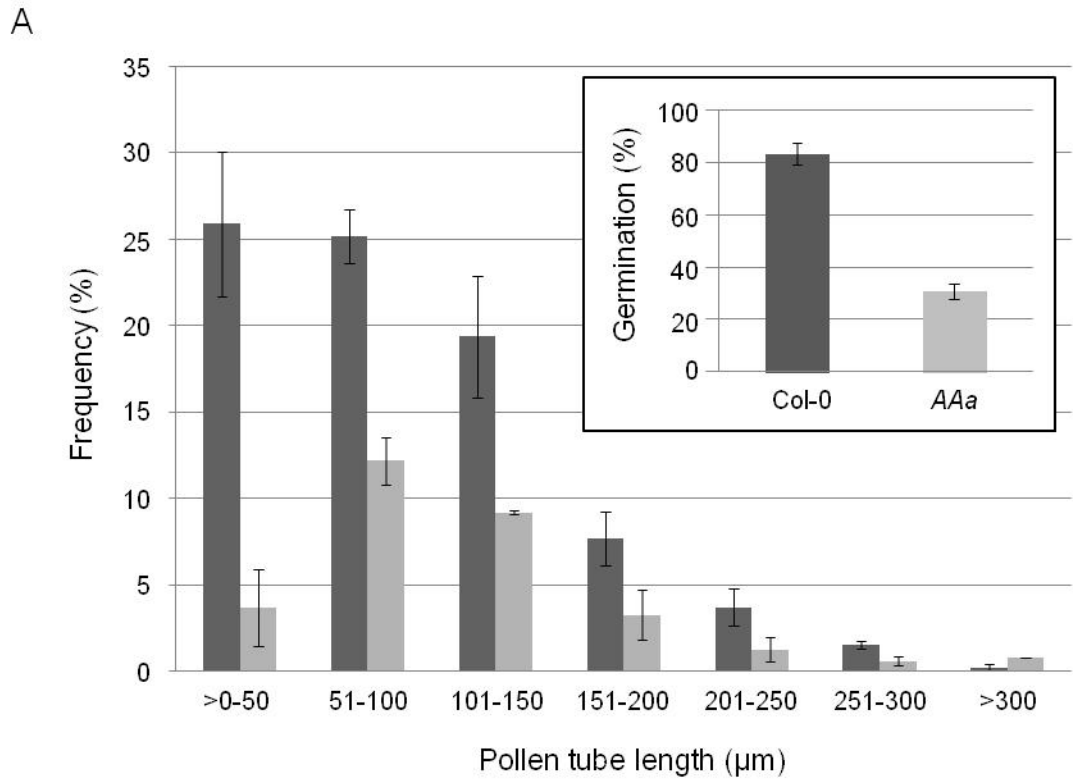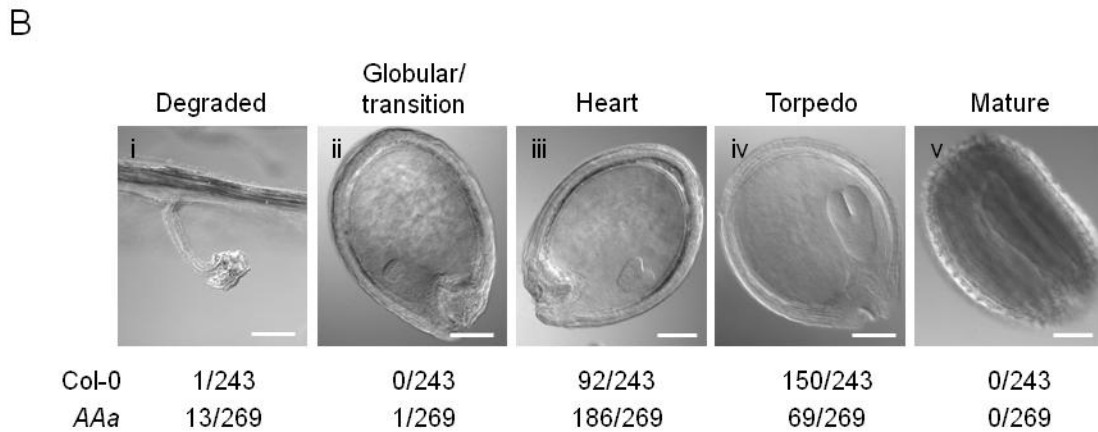

**Figure S3. Pollen germination and embryo development in tertiary trisomy 2.**

(A) Pollen grains from *aur2-1/+* show impaired pollen germination and pollen tube growth. The *in vitro* pollen germination of pollen grains from the wild type (Col-0) and *aur2-1/+* were scored by microscopy and measured by use of ImageJ after 8-h incubation in germination agar medium. Data are mean±SD from 3 independent experiments (n = 400~500). (B) Representative differential interference contrast (DIC) images of developing embryos in wild type (Col-0) and tertiary trisomy 2 (*aur2-1/+*; *AAa*) whose ovules were both manually pollinated by WT pollen. Quantitative data of the embryos at 6 days after pollination (DAP) are shown. Scale bar, 100 μm.

A

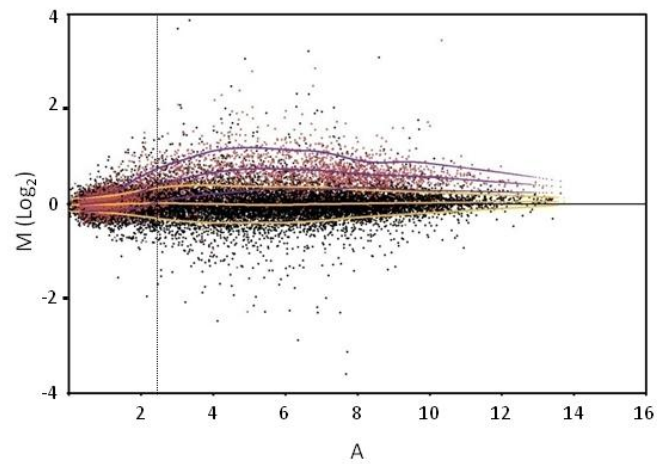

B

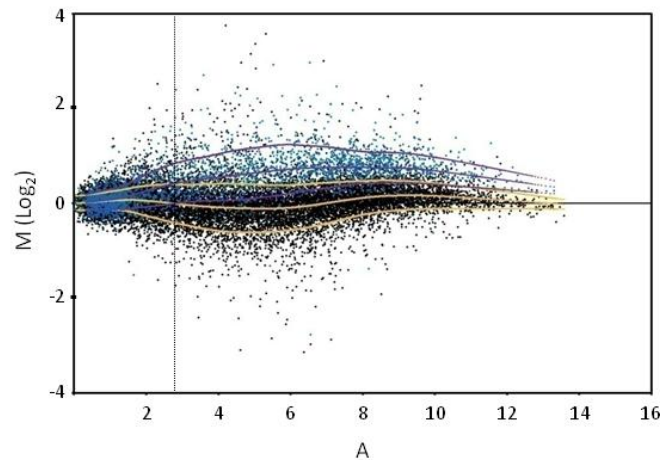

**Figure S4.  $M(A)$  plots of the intensity differences between the trisomics and WT.**

(A)  $M(A)$  plot of trisomy 2; (B)  $M(A)$  plot of tertiary trisomy 2. The  $M$  values ( $\log_2$  ratios) of the trisomy 2 and wild type (Col-0) are represented in the  $y$ -axis and the  $A$  values (the average expression) between the trisomics are represented in the  $x$ -axis. Red and blue dots, entities of the triplicated chromosomes; black dots, entities of other non-triplicated chromosomes; purple and orange lines, moving average. Upper and lower lines of the purple or orange lines, moving average  $\pm$  SD. Sufficiently strongly expressed transcripts (the dots to the right of the dash lines) were isolated to perform the transcriptional signature analysis in this study. The methodology of data analysis is from Huettel et al. (2008) [5].

## Supplemental Tables

**Table S1. The ratio of undeveloped seeds in the progeny of self-fertilized and manual crosses of *aur2-1/+* and wild-type (Col-0) plants**

| Parental plants<br>(female x male) | F1 progeny            |                     |
|------------------------------------|-----------------------|---------------------|
|                                    | Undeveloped seeds (%) | Total seeds counted |
| Col-0 self-fertilized              | 0.80                  | 611                 |
| <i>aur2-1/+</i> self-fertilized    | 18.62                 | 1204                |
| Col-0 × Col-0                      | 1.23                  | 246                 |
| <i>aur2-1/+</i> × Col-0            | 14.73                 | 325                 |
| Col-0 × <i>aur2-1/+</i>            | 8.26                  | 620                 |

**Table S2. Enriched gene ontology (GO) terms of genes that are misregulated specifically in the trisomy 2 or tertiary trisomy 2.**

| <b>Category</b>   | <b>GO term</b> | <b>Description (Ontology<sup>b</sup>)</b> | <b>p-value</b> | <b>FDR</b> |
|-------------------|----------------|-------------------------------------------|----------------|------------|
| <i>AAA</i> only   | GO:0050896     | response to stimulus (P)                  | 6.7E-11        | 1.9E-08    |
| (up-regulation)   | GO:0009813     | flavonoid biosynthetic process (P)        | 1.2E-07        | 9.3E-06    |
|                   | GO:0006950     | response to stress (P)                    | 4.1E-07        | 2.1E-05    |
|                   | GO:0006952     | defense response (P)                      | 1.5E-06        | 6.4E-05    |
|                   | GO:0019748     | secondary metabolic process (P)           | 6.5E-06        | 2.5E-04    |
|                   | GO:0006350     | transcription (P)                         | 3.9E-03        | 5.0E-02    |
|                   | GO:0007165     | signal transduction (P)                   | 8.4E-04        | 1.4E-02    |
|                   | GO:0009725     | response to hormone stimulus (P)          | 9.4E-04        | 1.5E-02    |
|                   | GO:0003824     | catalytic activity (F)                    | 4.8E-06        | 2.8E-04    |
|                   | GO:0016740     | transferase activity (F)                  | 2.0E-08        | 2.3E-06    |
|                   | GO:0003677     | DNA binding (F)                           | 2.9E-04        | 2.1E-02    |
|                   | GO:0005730     | nucleolus (C)                             | 1.3E-04        | 2.1E-02    |
|                   |                |                                           |                |            |
| <i>AAA</i> only   | GO:0009991     | response to extracellular stimulus (P)    | 9.9E-08        | 4.0E-05    |
| (down-regulation) | GO:0050896     | response to stimulus (P)                  | 3.0E-05        | 3.0E-03    |
|                   | GO:0009791     | post-embryonic development (P)            | 4.4E-04        | 2.5E-02    |
|                   | GO:0006950     | response to stress (P)                    | 5.5E-04        | 2.7E-02    |
|                   | GO:0016787     | hydrolase activity (F)                    | 8.3E-04        | 4.4E-02    |
|                   |                |                                           |                |            |
| <i>AAa</i> only   | GO:0050896     | response to stimulus (P)                  | 4.7E-24        | 3.3E-21    |
| (up-regulation)   | GO:0006950     | response to stress (P)                    | 1.2E-21        | 5.1E-19    |
|                   | GO:0006952     | defense response (P)                      | 6.3E-16        | 1.1E-13    |
|                   | GO:0051704     | multi-organism process (P)                | 1.3E-15        | 2.1E-13    |
|                   | GO:0006955     | immune response (P)                       | 8.5E-12        | 8.5E-10    |
|                   | GO:0016052     | carbohydrate catabolic process (P)        | 1.2E-09        | 6.3E-08    |
|                   | GO:0006810     | transport (P)                             | 7.3E-09        | 3.4E-07    |
|                   | GO:0006508     | proteolysis (P)                           | 2.9E-07        | 9.6E-06    |
|                   | GO:0008219     | cell death (P)                            | 6.0E-05        | 1.2E-03    |
|                   | GO:0015994     | chlorophyll metabolic process (P)         | 5.0E-04        | 9.0E-03    |
|                   | GO:0019748     | secondary metabolic process (P)           | 5.0E-04        | 9.0E-03    |
|                   | GO:0003824     | catalytic activity (F)                    | 2.3E-10        | 1.0E-07    |
|                   | GO:0016787     | hydrolase activity (F)                    | 4.0E-05        | 3.1E-03    |
|                   | GO:0005215     | transporter activity (F)                  | 9.0E-05        | 5.9E-03    |
|                   | GO:0005773     | vacuole (C)                               | 2.5E-12        | 9.8E-11    |
|                   | GO:0000502     | proteasome complex (C)                    | 1.3E-11        | 3.3E-10    |

|                   |            |                                             |          |          |
|-------------------|------------|---------------------------------------------|----------|----------|
|                   | GO:0005886 | plasma membrane (C)                         | 1.1E-06  | 1.7E-05  |
|                   | GO:0005783 | endoplasmic reticulum (C)                   | 8.9E-06  | 1.4E-04  |
|                   | GO:0009536 | plastid (C)                                 | 1.90E-03 | 2.60E-02 |
|                   | GO:0005739 | mitochondrion (C)                           | 2.60E-03 | 3.40E-02 |
|                   |            |                                             |          |          |
| <i>Aa</i> only    | GO:0019758 | glycosinolate biosynthetic process (P)      | 1.8E-19  | 5.8E-17  |
| (down-regulation) | GO:0005975 | carbohydrate metabolic process (P)          | 1.3E-09  | 7.6E-08  |
|                   | GO:0006790 | sulfur metabolic process (P)                | 6.1E-09  | 3.0E-07  |
|                   | GO:0016310 | phosphorylation (P)                         | 2.6E-08  | 1.2E-06  |
|                   | GO:0008152 | metabolic process (P)                       | 1.4E-07  | 5.6E-06  |
|                   | GO:0022402 | cell cycle process (P)                      | 1.3E-06  | 4.4E-05  |
|                   | GO:0019748 | secondary metabolic process (P)             | 3.4E-06  | 1.0E-04  |
|                   | GO:0042545 | cell wall modification (P)                  | 7.6E-05  | 1.8E-03  |
|                   | GO:0043687 | post-translational protein modification (P) | 6.9E-04  | 1.5E-02  |
|                   | GO:0003824 | catalytic activity (F)                      | 1.3E-18  | 5.4E-16  |
|                   | GO:0016740 | transferase activity (F)                    | 3.1E-10  | 6.5E-08  |
|                   | GO:0016787 | hydrolase activity (F)                      | 3.5E-07  | 4.9E-05  |
|                   | GO:0016301 | kinase activity (F)                         | 4.4E-06  | 3.1E-04  |
|                   | GO:0005618 | cell wall (C)                               | 3.5E-16  | 5.9E-14  |
|                   | GO:0005886 | plasma membrane (C)                         | 2.5E-07  | 8.8E-06  |
|                   | GO:0043226 | organelle (C)                               | 2.9E-03  | 4.4E-02  |

<sup>a</sup> GO was analyzed by using agriGO, Du et al. (2012) [33]

<sup>b</sup> Biological process (P); molecular function (F); cellular component (C)



**Table S3. Enriched GO terms of significantly upregulated genes in the trisomy 2, tertiary trisomy 2, and trisomy 5**

| GO Term           | Description                             | Trisomy 2<br>(AAA) |         | Tertiary trisomy 2<br>(Aaa) |         | Trisomy 5 |         |
|-------------------|-----------------------------------------|--------------------|---------|-----------------------------|---------|-----------|---------|
|                   |                                         | <i>p</i>           | FDR     | <i>p</i>                    | FDR     | <i>p</i>  | FDR     |
| <b>GO:0008150</b> | <b>Biological_process</b>               |                    |         |                             |         |           |         |
| <b>GO:0050896</b> | <b>response to stimulus</b>             | 2.7E-17            | 2.5E-14 | 3.4E-49                     | 9.3E-47 | 2.0E-41   | 6.7E-39 |
| GO:0006950        | response to stress                      | 5.9E-10            | 7.6E-08 | 1.4E-37                     | 1.2E-35 | 3.3E-33   | 5.7E-31 |
| GO:0009607        | response to biotic stimulus             | 2.7E-08            | 1.9E-06 | 7.4E-41                     | 1.0E-38 | 1.2E-15   | 1.0E-13 |
| GO:0009628        | response to abiotic stimulus            | 8.1E-06            | 2.1E-04 | 5.2E-12                     | 2.0E-10 | 1.3E-16   | 1.5E-14 |
| GO:0009719        | response to endogenous stimulus         | 9.5E-10            | 9.6E-08 | 1.1E-17                     | 5.2E-16 | 3.2E-15   | 2.2E-13 |
| GO:0009605        | response to external stimulus           | 2.1E-10            | 3.8E-08 | 1.1E-17                     | 5.2E-16 | 3.0E-12   | 1.5E-10 |
| GO:0010033        | response to organic substance           | 1.9E-13            | 8.4E-11 | 8.9E-26                     | 1.9E-23 | 2.1E-30   | 1.2E-27 |
| GO:0042221        | response to chemical stimulus           | 1.5E-12            | 4.5E-10 | 1.4E-27                     | 4.0E-25 | 1.7E-36   | 1.8E-33 |
| GO:0009725        | response to hormone stimulus            | 1.2E-04            | 5.4E-03 | 6.5E-16                     | 4.0E-14 | 1.6E-14   | 2.9E-12 |
| GO:0006952        | defense response                        | 1.3E-07            | 3.3E-06 | 7.1E-22                     | 7.5E-20 | 2.1E-09   | 1.5E-07 |
| GO:0006955        | immune response                         | 3.3E-06            | 6.1E-05 | 4.5E-18                     | 3.7E-16 | 6.3E-04   | 1.5E-02 |
| <b>GO:0051179</b> | <b>localization</b>                     | 5.4E-03            | 5.0E-02 | 2.4E-09                     | 6.6E-08 | 5.0E-07   | 1.7E-05 |
| GO:0051234        | establishment of localization           | 6.6E-03            | -       | 3.9E-10                     | 1.2E-08 | 4.3E-06   | 1.2E-04 |
| GO:0010876        | lipid localization                      | 2.5E-09            | 2.1E-07 | 2.0E-03                     | 2.7E-02 | 4.3E-08   | 2.7E-06 |
| GO:0006810        | transport                               | 6.4E-03            | -       | 3.4E-10                     | 1.2E-08 | 2.0E-05   | 1.2E-04 |
| <b>GO:0050789</b> | <b>regulation of biological process</b> | 1.1E-04            | 1.8E-03 | 6.1E-05                     | 8.3E-04 | 1.3E-04   | 2.7E-03 |
| GO:0051704        | multi-organism process                  | 2.4E-06            | 8.0E-05 | 1.5E-25                     | 1.0E-23 | 7.2E-13   | 4.1E-11 |
| GO:0008152        | metabolic process                       | 1.2E-04            | 1.9E-03 | 9.8E-03                     | -       | -         | -       |
| GO:0044238        | primary metabolic process               | 1.3E-04            | 1.7E-03 | -                           | -       | -         | -       |
| GO:0019748        | secondary metabolic process             | 5.6E-08            | 3.4E-06 | 6.8E-08                     | 1.7E-06 | 1.9E-04   | 3.8E-03 |
| GO:0007165        | signal transduction                     | 8.4E-04            | 1.4E-02 | 3.5E-03                     | -       | 4.6E-05   | 1.1E-03 |
| GO:0009812        | flavonoid metabolic process             | 9.5E-14            | 5.1E-12 | 4.9E-04                     | 7.6E-03 | -         | -       |
| GO:0016052        | carbohydrate catabolic process          | -                  | -       | 1.2E-09                     | 6.3E-08 | -         | -       |
| GO:0006508        | proteolysis                             | -                  | -       | 2.9E-07                     | 9.6E-06 | -         | -       |
| GO:0008219        | cell death                              | -                  | -       | 2.7E-04                     | 4.9E-03 | -         | -       |
| GO:0007568        | aging                                   | -                  | -       | 5.5E-04                     | 8.4E-03 | -         | -       |
| <b>GO:0006350</b> | <b>transcription</b>                    | 3.7E-06            | 6.6E-05 | 2.0E-02                     | -       | 3.7E-06   | 6.6E-05 |
|                   |                                         |                    |         |                             |         |           |         |
| GO:0003700        | transcription factor activity           | 7.6E-06            | 6.7E-04 | -                           | -       | 5.6E-07   | 2.8E-05 |
| GO:0030528        | transcription regulator activity        | 3.1E-05            | 1.3E-03 | -                           | -       | 1.3E-06   | 4.3E-05 |
|                   |                                         |                    |         |                             |         |           |         |
| <b>GO:0003674</b> | <b>Molecular_function</b>               |                    |         |                             |         |           |         |
| <b>GO:0003824</b> | <b>catalytic activity</b>               | 4.2E-07            | 1.1E-04 | 6.2E-12                     | 5.6E-10 | 8.7E-08   | 8.7E-06 |
| GO:0016740        | transferase activity                    | 3.1E-04            | 2.0E-02 | 7.8E-03                     | -       | 3.6E-04   | 4.5E-03 |
| GO:0016787        | hydrolase activity                      | 2.4E-03            | -       | 1.2E-05                     | 3.6E-04 | -         | -       |
| GO:0005215        | transporter activity                    | -                  | -       | 4.5E-08                     | 2.0E-06 | 1.8E-05   | 3.0E-04 |

|                   |                                         |         |         |         |         |         |         |
|-------------------|-----------------------------------------|---------|---------|---------|---------|---------|---------|
| GO:0016491        | oxidoreductase activity                 | 1.9E-05 | 1.2E-03 | -       | -       | -       | -       |
| GO:0016301        | kinase activity                         | -       | -       | 2.0E-02 | -       | 1.8E-03 | 0.02    |
| <b>GO:0005488</b> | <b>binding</b>                          | 8.4E-05 | 2.8E-03 | -       | -       | 3.2E-06 | 8.0E-05 |
| GO:0003677        | DNA binding                             | 1.3E-04 | 1.3E-04 | -       | -       | 1.8E-05 | 3.0E-04 |
| GO:0005515        | protein binding                         | -       | -       | -       | -       | 4.1E-05 | 5.9E-04 |
| GO:0008289        | lipid binding                           | 1.0E-02 | -       | -       | -       | 2.4E-03 | 0.05    |
| GO:0019825        | oxygen binding                          | 3.1E-05 | 1.3E-03 | -       | -       | -       | -       |
|                   |                                         |         |         |         |         |         |         |
| <b>GO:0005575</b> | <b>Cellular_component</b>               |         |         |         |         |         |         |
| <b>GO:0044464</b> | <b>cell part</b>                        | 1.8E-03 | 0.05    | 5.8E-07 | 2.5E-05 | 1.0E-14 | 4.6E-13 |
| <b>GO:0044424</b> | <b>intracellular part</b>               | -       | -       | 2.4E-04 | 3.4E-03 | 6.6E-08 | 2.0E-06 |
| GO:0005622        | intracellular                           | -       | -       | 5.3E-04 | 6.9E-03 | 5.7E-08 | 2.0E-06 |
| GO:0005737        | cytoplasm                               | -       | -       | 5.4E-06 | 1.7E-04 | 4.1E-04 | 5.7E-03 |
| GO:0005773        | vacuole                                 | -       | -       | 9.8E-06 | 2.5E-04 | 3.6E-05 | 5.9E-04 |
| GO:0016020        | membrane                                | 3.0E-02 | -       | 3.9E-08 | 5.1E-06 | 1.3E-15 | 1.1E-13 |
| GO:0005886        | plasma membrane                         | 3.0E-02 | -       | 1.1E-05 | 2.5E-04 | 9.0E-19 | 1.6E-16 |
| GO:0005783        | endoplasmic reticulum                   | -       | -       | 6.0E-05 | 9.8E-04 | 2.0E-04 | 3.1E-03 |
| GO:0022624        | proteasome accessory complex            | -       | -       | 1.3E-11 | 3.3E-10 | -       | -       |
| <b>GO:0030312</b> | <b>external encapsulating structure</b> | 7.6E-05 | 9.1E-03 | 9.9E-04 | 9.2E-03 | -       | -       |
| GO:0005618        | cell wall                               | 2.9E-04 | 2.0E-02 | 8.7E-04 | 8.7E-03 | -       | -       |
| <b>GO:0043226</b> | <b>organelle</b>                        | -       | -       | 1.2E-02 | -       | 8.7E-06 | 1.6E-04 |

This list includes the upregulated genes common to all three trisomic mutants ( $1.5\times$  fold change,  $p<0.05$ ). GO was analyzed by use of agriGO, Du et al. (2012) [33]. FDR: chi-square test; - : not detected. Data for trisomy 5 are from Huettel et al. (2008) [5].

**Table S4. Enriched GO terms of significantly downregulated genes in the trisomy 2, tertiary trisomy 2, and trisomy 5**

| GO Term           | Description                                          | Trisomy 2<br>(AAA) |         | Tertiary trisomy 2<br>(AAa) |         | Trisomy 5 |         |
|-------------------|------------------------------------------------------|--------------------|---------|-----------------------------|---------|-----------|---------|
|                   |                                                      | <i>p</i>           | FDR     | <i>p</i>                    | FDR     | <i>p</i>  | FDR     |
| <b>GO:0008150</b> | <b>Biological_process</b>                            |                    |         |                             |         |           |         |
| <b>GO:0008152</b> | <b>metabolic process</b>                             | -                  | -       | 8.4E-09                     | 1.3E-06 | 2.9E-14   | 9.3E-12 |
| GO:0044238        | primary metabolic process                            | -                  | -       | 7.6E-06                     | 7.6E-04 | 3.5E-10   | 1.6E-08 |
| GO:0019748        | secondary metabolic process                          | -                  | -       | 1.3E-05                     | 8.8E-04 | -         | -       |
| GO:0044237        | cellular metabolic process                           | -                  | -       | 1.3E-05                     | 8.8E-04 | 1.7E-05   | 4.2E-04 |
| GO:0019538        | protein metabolic process                            | -                  | -       | 2.0E-03                     | -       | 2.5E-05   | 5.8E-04 |
| <b>GO:0009987</b> | <b>cellular process</b>                              | -                  | -       | 4.6E-04                     | 1.0E-02 | 3.1E-13   | 3.3E-11 |
| GO:0044237        | cellular metabolic process                           | -                  | -       | 1.5E-05                     | 5.6E-04 | 2.6E-13   | 3.3E-11 |
| GO:0034641        | cellular nitrogen compound metabolic process         | -                  | -       | 1.4E-04                     | 4.3E-03 | 5.7E-15   | 2.9E-12 |
| GO:0009058        | biosynthetic process                                 | -                  | -       | 2.4E-03                     | -       | 2.5E-12   | 1.7E-10 |
| GO:0043436        | oxoacid metabolic process                            | -                  | -       | 1.4E-04                     | 4.3E-03 | 7.7E-10   | 7.2E-08 |
| GO:0006519        | cellular amino acid and derivative metabolic process | -                  | -       | -                           | -       | 9.0E-08   | 3.3E-06 |
| GO:0019761        | glucosinolate biosynthetic process                   | -                  | -       | 4.1E-25                     | 1.4E-22 | -         | -       |
| GO:0044262        | cellular carbohydrate metabolic process              | 1.0E-02            | -       | 1.0E-22                     | 2.7E-20 | 2.0E-02   | -       |
| GO:0022402        | cell cycle process                                   | -                  | -       | 6.9E-04                     | 1.5E-02 | -         | -       |
| GO:0042254        | ribosome biogenesis                                  | -                  | -       | -                           | -       | 6.5E-19   | 9.8E-16 |
| GO:0006412        | translation                                          | -                  | -       | -                           | -       | 3.0E-08   | 1.2E-06 |
| GO:0034660        | ncRNA metabolic process                              | -                  | -       | -                           | -       | 1.8E-05   | 7.8E-04 |
| GO:0015979        | photosynthesis                                       | -                  | -       | -                           | -       | 3.6E-06   | 9.7E-05 |
| <b>GO:0050896</b> | <b>response to stimulus</b>                          | 9.5E-14            | 2.8E-11 | 1.0E-03                     | 4.0E-02 | 4.0E-02   | -       |
| GO:0006950        | response to stress                                   | 6.4E-05            | 2.3E-03 | 1.0E-02                     | -       | -         | -       |
| <b>GO:0032502</b> | <b>developmental process</b>                         | -                  | -       | -                           | -       | 2.7E-04   | 4.0E-03 |
| GO:0009791        | post-embryonic development                           | 4.0E-02            | -       | -                           | -       | 2.6E-12   | 1.7E-10 |
| GO:0003006        | reproductive developmental process                   | -                  | -       | -                           | -       | 2.4E-04   | 3.8E-03 |
|                   |                                                      |                    |         |                             |         |           |         |
| <b>GO:0003674</b> | <b>Molecular_function</b>                            |                    |         |                             |         |           |         |
| <b>GO:0003824</b> | <b>catalytic activity</b>                            | 2.9E-05            | 2.9E-03 | 6.3E-17                     | 5.4E-15 | 1.0E-12   | 4.7E-11 |
| GO:0016787        | hydrolase activity                                   | 3.4E-04            | 0.02    | 2.5E-07                     | 1.1E-05 | 1.2E-06   | 3.7E-05 |
| GO:0004091        | carboxylesterase activity                            | 2.0E-06            | 4.3E-04 | 3.8E-06                     | 1.7E-04 | -         | -       |
| GO:0016491        | oxidoreductase activity                              | 1.0E-02            | -       | 1.1E-18                     | 1.7E-16 | 5.1E-03   | -       |

|                   |                             |   |   |         |         |         |         |
|-------------------|-----------------------------|---|---|---------|---------|---------|---------|
| GO:0016740        | transferase activity        | - | - | 5.0E-06 | 1.2E-04 | 1.0E-02 | -       |
| GO:0016301        | kinase activity             | - | - | 1.3E-04 | 1.9E-03 | 3.0E-02 | -       |
|                   |                             |   |   |         |         |         |         |
| <b>GO:0005575</b> | <b>Cellular_component</b>   |   |   |         |         |         |         |
| <b>GO:0044464</b> | <b>cell part</b>            | - | - | 1.1E-11 | 3.6E-10 | 1.2E-24 | 1.4E-23 |
| GO:0044424        | intracellular part          | - | - | 1.1E-03 | 2.0E-02 | 4.0E-34 | 1.3E-32 |
| GO:0005622        | intracellular               | - | - | 4.2E-03 | -       | 3.4E-34 | 1.3E-32 |
| GO:0005737        | cytoplasm                   | - | - | 8.0E-03 | -       | 1.7E-44 | 9.6E-43 |
| GO:0016020        | membrane                    | - | - | 1.7E-03 | 3.0E-02 | 1.0E-05 | 6.8E-05 |
| GO:0005886        | plasma membrane             | - | - | 6.7E-04 | 3.0E-02 | 7.2E-05 | 4.3E-04 |
| GO:0005730        | nucleolus                   | - | - | -       | -       | 2.3E-08 | 1.7E-07 |
| <b>GO:0005576</b> | <b>extracellular region</b> | - | - | 1.6E-04 | 4.3E-03 | 1.0E-02 | 5.0E-02 |
| GO:0005618        | cell wall                   | - | - | 3.5E-15 | 3.8E-13 | 1.7E-03 | 9.3E-03 |
| <b>GO:0043226</b> | <b>organelle</b>            | - | - | -       | -       | 2.6E-32 | 7.3E-31 |

This list includes the downregulated genes common to all three trisomic mutants ( $1.5\times$  fold change,  $p < 0.05$ ). GO was analyzed by use of agriGO, Du et al. (2012) [33]. FDR: chi-square test; - : not detected. Data for trisomy 5 are from Huettel et al. (2008) [5].

**Table S5. The Punnett square for modeling segregation of the self-fertilized tertiary trisomy 2 (*AAa*, *aur2-1/+*)**

|               |  |                  |                  |                 |                 |
|---------------|--|------------------|------------------|-----------------|-----------------|
| ♀ \ ♂         |  | 1/6 <i>AA</i>    | 2/6 <i>Aa</i>    | 2/6 <i>A</i>    | 1/6 <i>a</i>    |
| 1/6 <i>AA</i> |  | 1/36 <i>AAAA</i> | 2/36 <i>AAAa</i> | 2/36 <i>AAA</i> | 1/36 <i>AAa</i> |
| 2/6 <i>Aa</i> |  | 2/36 <i>AAAa</i> | 4/36 <i>AAaa</i> | 4/36 <i>AAa</i> | 2/36 <i>Aaa</i> |
| 2/6 <i>A</i>  |  | 2/36 <i>AAA*</i> | 4/36 <i>AAa</i>  | 4/36 <i>AA</i>  | 2/36 <i>Aa</i>  |
| 1/6 <i>a</i>  |  | 1/36 <i>AAa</i>  | 2/36 <i>Aaa</i>  | 2/36 <i>Aa</i>  | 1/36 <i>aa</i>  |

*A*, wild-type *AUR2*; *a*, *aur2-1*; shaded boxes, no gametophytes or offspring; \*, progeny expected with low occurrence in the offspring.

Ratio indicates theoretical segregation for gametophytes and progeny.
